# Supplementary material for: Molecular Basis for Genetic Resistance of Anopheles gambiae to Plasmodium: Structural Analysis of TEP1 Susceptible and Resistant Alleles
Source: PubMed Central journal article supplement (PMC3464232; doi:10.1371/journal.ppat.1002958), 2012-10-04
Supplement: ppat.1002958.s005.pdf [file ppat.1002958.s005.pdf]

Table S2: TEP1\*S1 vs. TEP1\*R1 superposition of rigid domains

|   | Domains                        | $N_{\text{res}}$ | $C\alpha$ rmsd | residues          |
|---|--------------------------------|------------------|----------------|-------------------|
| 1 | M3, MG7, CUB, TED,<br>MG8, ANK | 744              | 0.96           | 222–324, 684–1332 |
| 2 | MG1, MG2, MG5, MG6             | 413              | 1.25           | 24–217, 423–683   |
| 3 | MG4                            | 96               | 2.03           | 327–422           |

  

| Domain Pair |   | Rotation (°) | Translation (Å) | Bending residues |
|-------------|---|--------------|-----------------|------------------|
| 1           | 2 | 11.2         | 0.5             | 217-222, 683-684 |
| 1           | 3 | 25.6         | 6.3             | 417-423          |
| 2           | 3 | 22.8         | 0.3             | 324-327          |
