# Supplementary material for: Molecular Basis for Genetic Resistance of Anopheles gambiae to Plasmodium: Structural Analysis of TEP1 Susceptible and Resistant Alleles
Source: PLoS Pathog. 2012 Oct 4;8(10):e1002958. doi: 10.1371/journal.ppat.1002958 (PMC3464232; doi:10.1371/journal.ppat.1002958)
Supplement: Table S1 — Data Collection and Refinement statistics (PDF) [file ppat.1002958.s004.pdf]

Table S1: Data Collection and Refinement statistics

|                                              | TEP1*S1               | TEP1*R1               |
|----------------------------------------------|-----------------------|-----------------------|
| <i>Data Collection</i>                       |                       |                       |
| Beamline                                     | NSLS X25C             |                       |
| Wavelength (Å)                               | 1.1                   |                       |
| Space Group                                  | $P4_3$                |                       |
| Unit cell ( $a, b, c$ ) (Å)                  | 196.472; 225.267      |                       |
| Resolution (Å)                               | 50-3.70 (3.76-3.70)   |                       |
| Unique reflections                           | 90735 (4503)          |                       |
| Redundancy                                   | 4.9 (5.1)             |                       |
| Completeness (%)                             | 99.9 (100.0)          |                       |
| $\langle I \rangle / \langle \sigma \rangle$ | 22.9 (2.0)            |                       |
| $R_{\text{sym}}$ (%)                         | 7.9 (89.1)            |                       |
| <i>Refinement</i>                            |                       |                       |
| Resolution (Å)                               | 50.0-3.70 (3.80-3.70) | 50.0-2.70 (2.73-2.70) |
| Reflections:                                 |                       |                       |
| Working set                                  | 86136 (6181)          | 68219 (2250)          |
| Test set                                     | 4583 (331)            | 3631 (125)            |
| $R_{\text{cryst}}$ (%)                       | 20.0 (30.3)           | 21.9 (37.7)           |
| $R_{\text{free}}$ (%)                        | 24.0 (35.1)           | 24.4 (43.1)           |
| Est. coord. err. (Å)                         | 0.35                  | 0.37                  |
| Rmsd from ideal:                             |                       |                       |
| Bond lengths (Å)                             | 0.015                 | 0.005                 |
| Bond angles (°)                              | 1.785                 | 1.018                 |
| Avg. B-factor (Å <sup>2</sup> )              |                       |                       |
| Atoms:                                       |                       |                       |
| Non-hydrogen                                 | 27047                 | 10343                 |
| Water                                        |                       | 133                   |
| Molprobity analysis:                         |                       |                       |
| All-atom clash score                         | 7.29                  | 1.12                  |
| Bad rotamers (%)                             | 6.1 (161/2648)        | 0.4 (5/1134)          |
| Ramachandran plot:                           |                       |                       |
| Outliers (%)                                 | 0.6 (21/3540)         | 0.3 (5/1264)          |
| Favored (%)                                  | 94.4 (3345/3540)      | 95.9 (1212/1274)      |
