# Supplementary material for: Molecular Basis for Genetic Resistance of Anopheles gambiae to Plasmodium: Structural Analysis of TEP1 Susceptible and Resistant Alleles
Source: PLoS Pathog. 2012 Oct 4;8(10):e1002958. doi: 10.1371/journal.ppat.1002958 (PMC3464232; doi:10.1371/journal.ppat.1002958)
Supplement: Table S4 — Conserved S/R polymorphisms within the TEP1 MG8 domain (PDF) [file ppat.1002958.s007.pdf]

Table S4: Conserved S/R polymorphisms within the TEP1 MG8 domain

| Res ID | TEP1*R | TEP1*S | Location           | Hum C3 | Comment                      |
|--------|--------|--------|--------------------|--------|------------------------------|
| 1195   | N      | H      | pre- $\beta$ A     | N1337  |                              |
| 1198   | Q      | K      | $\beta$ A          | D1340  |                              |
| 1215   | K      | R      | $\beta$ B          | E1365  |                              |
| 1219   | S      | N      |                    | R1369  |                              |
| 1223   | Q      | E      |                    | D1373  |                              |
| 1227   | R      | S      | $\beta$ B-C loop   | Q1374  |                              |
| 1228   | R      | Q      |                    | D1375  |                              |
| 1254   | K      | T      | switch region      |        |                              |
| 1260   | K      | N      | switch region      | K1409  | H-bonds to Gly 858 O         |
| 1261   | T      | M      |                    | Y1410  |                              |
| 1275   | D      | Y      | $\beta$ C-E loop   | D1427  | Tyr breaks H-bond to Trp 915 |
| 1279   | S      | T      | $\beta$ C'-E loop  | S1432  |                              |
| 1286   | L      | V      | $\beta$ E (buried) | F1439  |                              |
